# Supplementary material for: In Silico Identification and Validation of Organic Triazole Based Ligands as Potential Inhibitory Drug Compounds of SARS-CoV-2 Main Protease
Source: MDPI journal article supplement (doi:10.3390/molecules26206199), 2021-10-14
Supplement: s1 [file s1]

*Supplementary Information File*

**In silico identification and validation of organic triazole based ligands as potential inhibitory drug compounds of SARS-CoV-2 main protease**

Vishma Pratap Sur<sup>1</sup>, Madhab Kumar Sen<sup>2</sup>, Kateřina Komrsková<sup>1, 3\*</sup>

<sup>1</sup>Laboratory of Reproductive Biology, Institute of Biotechnology of the Czech Academy of Sciences, BIOCEV, Prumyslova 595, 25250 Vestec, Czech Republic.  
[vishmapratap.sur@ibt.cas.cz](mailto:vishmapratap.sur@ibt.cas.cz)

<sup>2</sup>Department of Agroecology and Crop Production, Faculty of Agrobiolgy, Food and Natural Resources, Czech University of Life Sciences Prague, Kamýcka 1176, Prague 6, 165 00, Suchbátov, Czech Republic. [senm@af.czu.cz](mailto:senm@af.czu.cz)

<sup>3</sup>Department of Zoology, Faculty of Science, Charles University, Vinicná 7, 12844 Prague 2, Czech Republic. [katerina.komrskova@ibt.cas.cz](mailto:katerina.komrskova@ibt.cas.cz)

\* Author to whom correspondence should be addressed.

Table S1 List of Viruses used for triazole based ligand's antiviral activity screening [1]

| Sr No. | Name of Viruses                           |
|--------|-------------------------------------------|
| 1      | Human immunodeficiency virus (HIV)        |
| 2      | Hepatitis C virus (HCV)                   |
| 3      | Hepatitis B virus (HBV)                   |
| 4      | Human herpesvirus                         |
| 5      | Dengue virus                              |
| 6      | Enterovirus Human                         |
| 7      | adenovirus Human                          |
| 8      | cox B1                                    |
| 9      | Human echovirus 9                         |
| 10     | Human enterovirus                         |
| 11     | Human polio virus                         |
| 12     | Human rhinovirus                          |
| 13     | Human T lymphotropic virus                |
| 14     | Influenza A                               |
| 15     | Influenza A (H1N1)                        |
| 16     | Influenza B                               |
| 17     | Monkeypox virus                           |
| 18     | Respiratory syncytial virus               |
| 19     | Rift Valley fever virus (Cercopithecidae) |
| 20     | Sandfly fever Sicilian virus              |
| 21     | SARS coronavirus                          |
| 22     | Simian virus                              |
| 23     | Sindbis virus                             |
| 24     | Vaccinia virus WR                         |
| 25     | Variola virus                             |
| 26     | Vesicular stomatitis virus                |
| 27     | West Nile virus                           |
| 28     | Yellow fever virus                        |
| 29     | Human cox B5                              |
| 30     | Human echovirus 13                        |

Table S2 List of interacting residues participating in M<sup>pro</sup> ligand pocket formation

| PocID | Chain | SeqID | AA  | Atom |
|-------|-------|-------|-----|------|
| 1     | A     | 22    | CYS | C    |
| 1     | A     | 22    | CYS | O    |
| 1     | A     | 22    | CYS | SG   |
| 1     | A     | 23    | GLY | CA   |
| 1     | A     | 24    | THR | N    |
| 1     | A     | 24    | THR | OG1  |
| 1     | A     | 25    | THR | CB   |
| 1     | A     | 25    | THR | OG1  |
| 1     | A     | 25    | THR | CG2  |
| 1     | A     | 26    | THR | O    |
| 1     | A     | 27    | LEU | CB   |
| 1     | A     | 27    | LEU | CD2  |
| 1     | A     | 41    | HIS | O    |
| 1     | A     | 41    | HIS | ND1  |
| 1     | A     | 41    | HIS | CD2  |
| 1     | A     | 41    | HIS | CE1  |
| 1     | A     | 41    | HIS | NE2  |
| 1     | A     | 42    | VAL | O    |
| 1     | A     | 43    | ILE | CA   |
| 1     | A     | 43    | ILE | C    |
| 1     | A     | 43    | ILE | O    |
| 1     | A     | 44    | CYS | C    |
| 1     | A     | 44    | CYS | O    |
| 1     | A     | 44    | CYS | CB   |
| 1     | A     | 45    | THR | CA   |
| 1     | A     | 45    | THR | C    |
| 1     | A     | 45    | THR | O    |
| 1     | A     | 45    | THR | CG2  |
| 1     | A     | 46    | SER | N    |
| 1     | A     | 46    | SER | CA   |
| 1     | A     | 46    | SER | O    |
| 1     | A     | 46    | SER | CB   |
| 1     | A     | 46    | SER | OG   |
| 1     | A     | 49    | MET | CB   |

|   |   |     |     |     |
|---|---|-----|-----|-----|
| 1 | A | 49  | MET | CG  |
| 1 | A | 49  | MET | CE  |
| 1 | A | 61  | LYS | CE  |
| 1 | A | 61  | LYS | NZ  |
| 1 | A | 140 | PHE | C   |
| 1 | A | 140 | PHE | O   |
| 1 | A | 140 | PHE | CB  |
| 1 | A | 141 | LEU | CA  |
| 1 | A | 141 | LEU | C   |
| 1 | A | 141 | LEU | O   |
| 1 | A | 142 | ASN | N   |
| 1 | A | 142 | ASN | CA  |
| 1 | A | 142 | ASN | OD1 |
| 1 | A | 143 | GLY | N   |
| 1 | A | 143 | GLY | CA  |
| 1 | A | 144 | SER | N   |
| 1 | A | 144 | SER | OG  |
| 1 | A | 145 | CYS | CB  |
| 1 | A | 145 | CYS | SG  |
| 1 | A | 163 | HIS | NE2 |
| 1 | A | 164 | HIS | O   |
| 1 | A | 164 | HIS | CB  |
| 1 | A | 165 | MET | CA  |
| 1 | A | 165 | MET | CB  |
| 1 | A | 165 | MET | SD  |
| 1 | A | 165 | MET | CE  |
| 1 | A | 166 | GLU | N   |
| 1 | A | 166 | GLU | O   |
| 1 | A | 166 | GLU | CB  |
| 1 | A | 166 | GLU | OE2 |
| 1 | A | 167 | LEU | CA  |
| 1 | A | 167 | LEU | CD2 |
| 1 | A | 168 | PRO | CG  |
| 1 | A | 168 | PRO | CD  |
| 1 | A | 181 | PHE | CZ  |
| 1 | A | 186 | VAL | O   |

|   |   |     |     |     |
|---|---|-----|-----|-----|
| 1 | A | 187 | ASP | CA  |
| 1 | A | 187 | ASP | C   |
| 1 | A | 187 | ASP | CB  |
| 1 | A | 188 | ARG | N   |
| 1 | A | 188 | ARG | CA  |
| 1 | A | 188 | ARG | C   |
| 1 | A | 188 | ARG | O   |
| 1 | A | 189 | GLN | N   |
| 1 | A | 189 | GLN | CA  |
| 1 | A | 189 | GLN | CB  |
| 1 | A | 189 | GLN | OE1 |
| 1 | A | 189 | GLN | NE2 |
| 1 | A | 190 | THR | N   |
| 1 | A | 190 | THR | O   |
| 1 | A | 192 | GLN | O   |
| 1 | A | 192 | GLN | CG  |
| 1 | A | 192 | GLN | NE2 |

Table S3 List of best ligand molecules according to their binding affinity score through docking process

| DrugBank ligand Chemical ID | Binding affinity values (kcal/mole) |
|-----------------------------|-------------------------------------|
| <b>DB12411</b>              | <b>-10.2</b>                        |
| <b>DB11262</b>              | <b>-9</b>                           |
| <b>DB07213</b>              | <b>-8.8</b>                         |
| <b>DB07020</b>              | <b>-8.8</b>                         |
| DB04285                     | -8.7                                |
| DB15396                     | -8.7                                |
| DB06295                     | -8.7                                |
| DB03231                     | -8.6                                |
| DB11652                     | -8.6                                |
| DB15310                     | -8.5                                |
| DB13993                     | -8.5                                |
| DB12886                     | -8.4                                |
| DB12895                     | -8.4                                |
| DB12740                     | -8.4                                |
| DB08006                     | -8.4                                |
| DB02651s                    | -8.4                                |
| DB03005                     | -8.4                                |
| DB00673                     | -8.2                                |
| DB03571                     | -8.2                                |
| DB07359                     | -8.2                                |
| DB11760                     | -8.2                                |
| DB11942                     | -8.2                                |
| DB12694                     | -8.2                                |
| DB15190                     | -8.2                                |
| DB13113                     | -8.1                                |
| DB12848                     | -8                                  |
| DB07072                     | -8                                  |

Table S4 Evaluation of Lipinski's rule of 5 with a drug-likeness score by Molsoft LLC: Drug-Likeness and molecular property prediction of the selected molecules (best 4 ligands)

| Compounds                | Mass (<500) | Hydrogen<br>bond<br>acceptor<br>(<10) | Hydrogen<br>bond donor<br>(<5) | LOGP<br>(<5) | Molar<br>Refractivity<br>(40-130) | Drug<br>likeness<br>(>0) |
|--------------------------|-------------|---------------------------------------|--------------------------------|--------------|-----------------------------------|--------------------------|
| Bemcentinib<br>(DB12411) | 506.29      | 5                                     | 3                              | 5.42         | 80.73                             | 0.06                     |
| Bisotrizole<br>(DB11262) | 658.40      | 6                                     | 2                              | 13.41        | 78.39                             | -0.59                    |
| PYIITM<br>(DB07213)      | 427.21      | 5                                     | 4                              | 4.08         | 91.08                             | 0.38                     |
| NIPFC<br>(DB07020)       | 370.12      | 5                                     | 3                              | 3.54         | 90.31                             | 0.07                     |

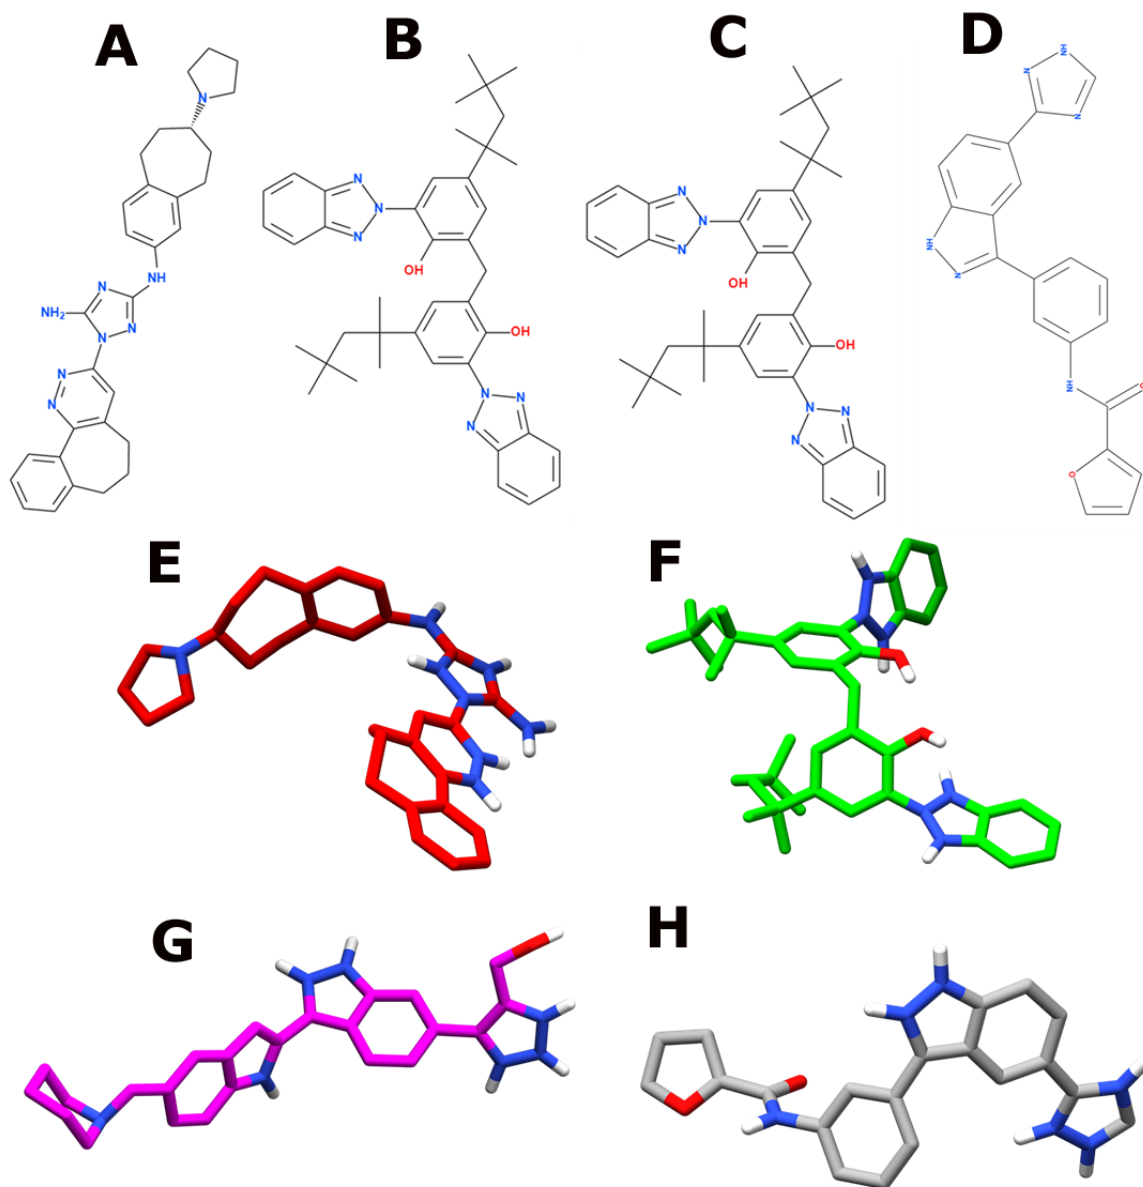

Figure S1 2D and 3D chemical structure of the best 4 triazole based organic ligands



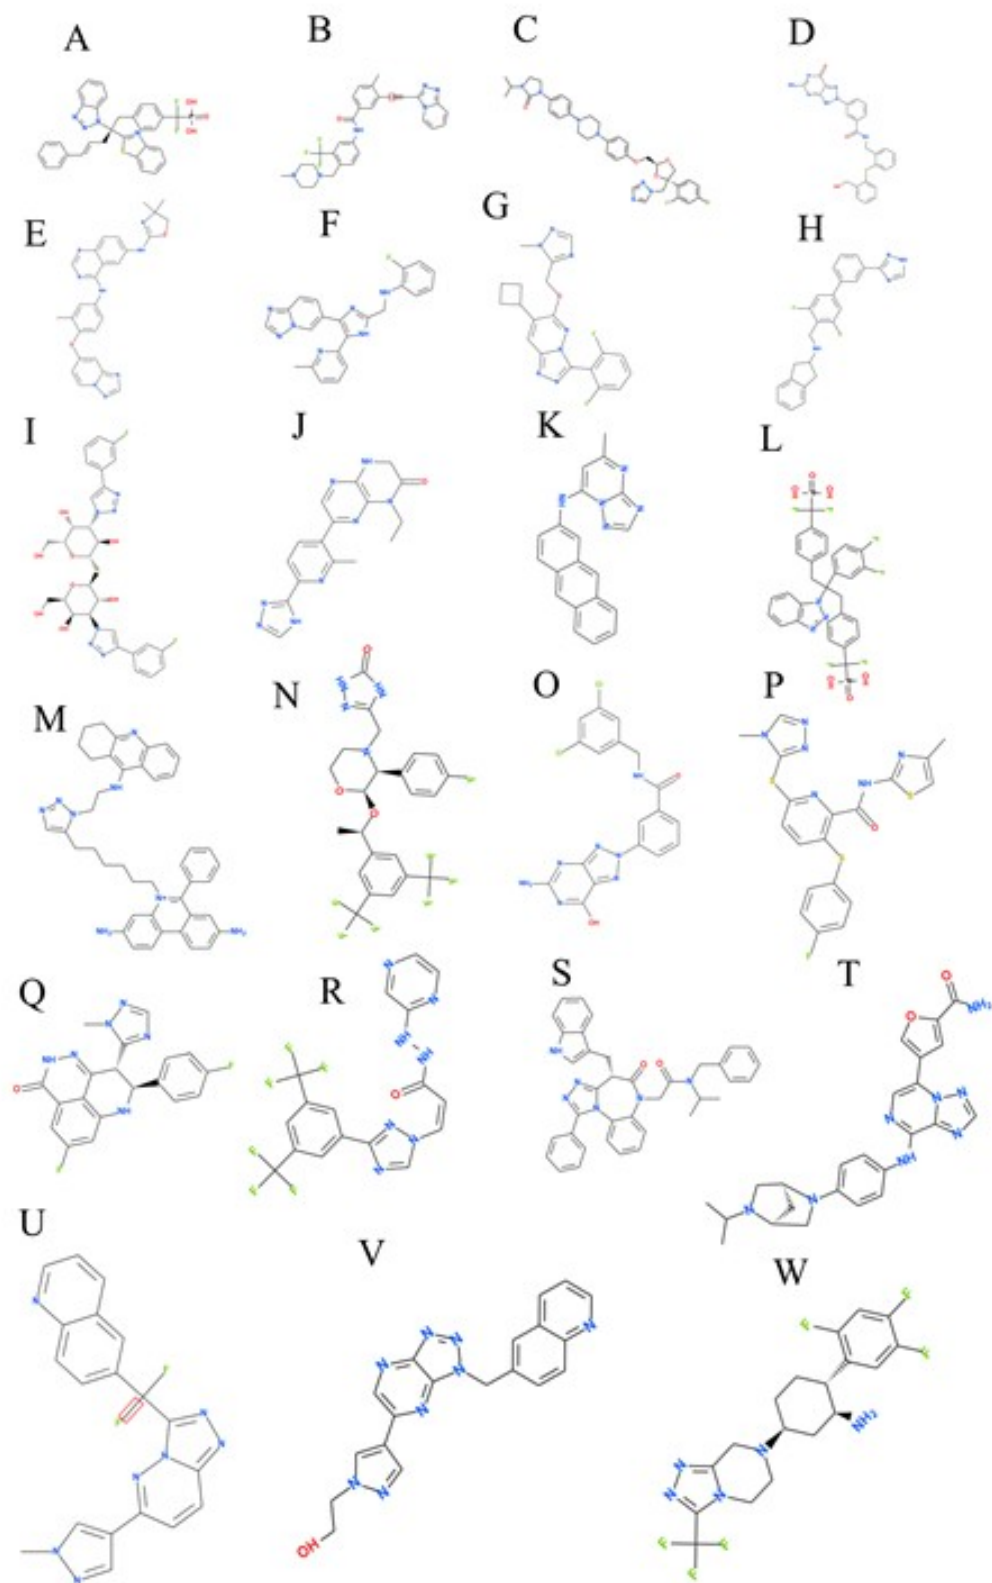

Figure S2 **2D** chemical structure of the best 23 triazole based organic ligands

Table S5: Ligands already used as M<sup>pro</sup> inhibitor, used as a reference with triazole ligands docking study.

| Ligand | Binding Affinity (kcal/mol) |
|--------|-----------------------------|
| 11a    | -7.2                        |
| 11b    | -7.5                        |

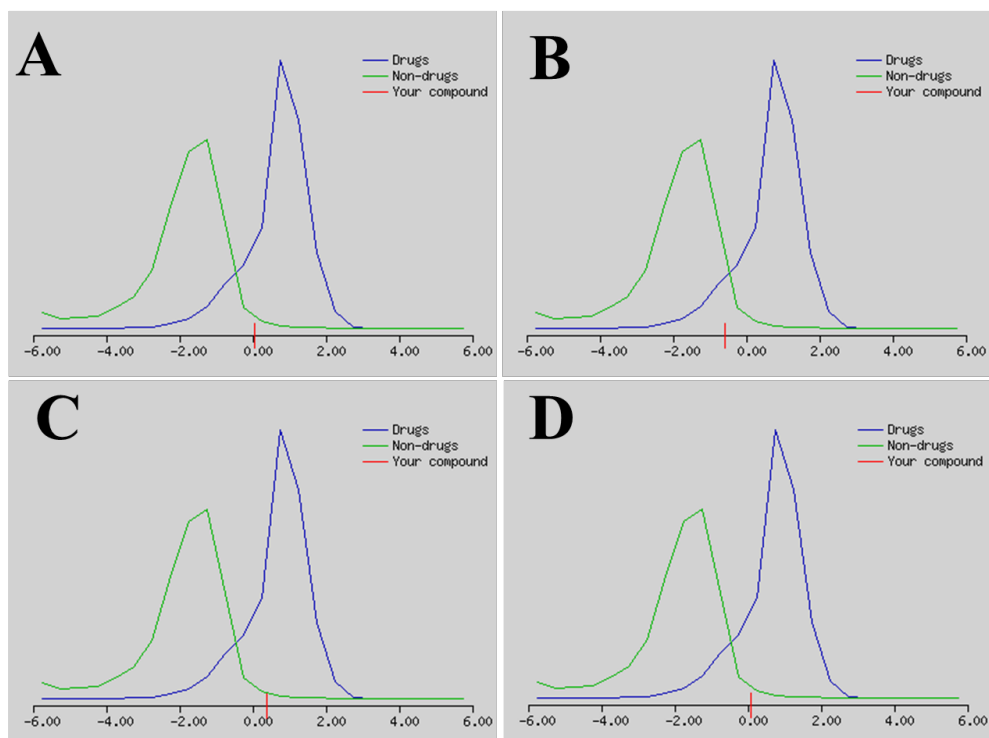

Figure S3 Drug likeness evaluation of selected ligands using Molsoft LLC: Drug-Likeness and molecular property prediction. Bemcentinib (DB12411) (A), Bisotrizole (DB11262) (B), PYIITM (DB07213) (C), and NIPFC (DB07020) (D)

Table S6 Triazole based organic ligands antiviral activity screening through web based antiviral compound prediction server

| Query molecule | General (%) | HBV (%) | HCV (%) | HHV (%) | HIV (%) |
|----------------|-------------|---------|---------|---------|---------|
| Bemcentinib    | 50.34       | 21.78   | 61.46   | 37.85   | 60.71   |
| Bisotriazole   | 61.38       | 21.54   | 70.42   | 30.32   | 60.32   |
| PYIITM         | 62.49       | 23.78   | 32.55   | 95.14   | 48.11   |
| NIPFC          | 36.00       | 28.59   | 36.52   | 39.13   | 60.61   |

#### Script S1 NVT run:

Title = Mpro-ligand complex NVT equilibration

Define = -DPOSRES ; position restrain the protein and ligand

#### Run parameters

Integrator = md ; leap-frog integrator

Nsteps = 50000 ; 2 \* 50000 = 100 ps

Dt = 0.002 ; 2 fs

#### Output control

Nstenergy = 500 ; save energies every 1.0 ps Nstlog

= 500 ; update log file every 1.0 ps Nstxout-

compressed = 500 ; save coordinates every 1.0 ps

#### Bond parameters

Continuation = no ; first dynamics run

Constraint\_algorithm = lincs ; holonomic constraints

Constraints = h-bonds ; bonds to H are constrained

Lincs\_iter = 1 ; accuracy of LINCS

Lincs\_order = 4 ; also related to accuracy

#### Neighbor searching and vdW

Cutoff-scheme = Verlet

Ns\_type = grid ; search neighboring grid cells

Nstlist = 20 ; largely irrelevant with Verlet

Rlist = 1.2

Vdwtype = cutoff

Vdw-modifier = force-switch

Rvdw-switch = 1.0

Rvdw = 1.2 ; short-range van der Waals cutoff (in nm)

### **Electrostatics**

Coulombtype = PME ; Particle Mesh Ewald for long-range electrostatics

Rcoulomb = 1.2 ; short-range electrostatic cutoff (in nm)

Pme\_order = 4 ; cubic interpolation

Fourierspacing = 0.16 ; grid spacing for FFT

### **Temperature coupling**

Tcoupl = V-rescale ; modified Berendsen thermostat

Tc-grps = Protein\_lig1 Water and\_ions ; two coupling groups - more accurate

Tau\_t = 0.1 0.1 ; time constant, in ps

Ref\_t = 300 300 ; reference temperature, one for each group, in K

### **Pressure coupling**

Pcoupl = no ; no pressure coupling in NVT

### **Periodic boundary conditions**

Pbc = xyz ; 3-D PBC

Dispersion correction is not used for proteins with the C36 additive FF

DispCorr = no

### **Velocity generation**

Gen\_vel = yes ; assign velocities from Maxwell distribution

Gen\_temp = 300 ; temperature for Maxwell distribution

Gen\_seed = -1 ; generate a random seed

### **Script S2 NPT run:**

Title = Mpro-ligand complex NPT equilibration

Define = -DPOSRES ; position restrain the protein and ligand

### **Run parameters**

Integrator = md ; leap-frog integrator

Nsteps = 50000 ; 2 \* 50000 = 100 ps

Dt = 0.002 ; 2 fs

### **Output control**

Nstenergy = 500 ; save energies every 1.0 ps

Nstlog = 500 ; update log file every 1.0 ps

Nstxout-compressed = 500 ; save coordinates every 1.0 ps

### **Bond parameters**

Continuation = yes ; continuing from NVT

Constraint\_algorithm = lincs ; holonomic constraints

Constraints = h-bonds ; bonds to H are constrained

Lincs\_iter = 1 ; accuracy of LINCS

Lincs\_order = 4 ; also related to accuracy

### **Neighbor searching and vdW**

Cutoff-scheme = Verlet

Ns\_type = grid ; search neighboring grid cells

Nstlist = 20 ; largely irrelevant with Verlet

Rlist = 1.2

Vdwtype = cutoff

Vdw-modifier = force-switch

Rvdw-switch = 1.0

Rvdw = 1.2 ; short-range van der Waals cutoff (in nm)

### **Electrostatics**

Coulombtype = PME ; Particle Mesh Ewald for long-range electrostatics

Rcoulomb = 1.2

Pme\_order = 4 ; cubic interpolation

Fourierspacing = 0.16 ; grid spacing for FFT

### **Temperature coupling**

Tcoupl = V-rescale ; modified Berendsen thermostat

Tc-grps = Protein\_lig1 Water\_and\_ions ; two coupling groups - more accurate

Tau\_t = 0.1 0.1 ; time constant, in ps

Ref\_t = 300 300 ; reference temperature, one for each group, in K

### Pressure coupling

Pcoupl = Berendsen ; pressure coupling is on for NPT

Pcoupltype = isotropic ; uniform scaling of box vectors

Tau\_p = 2.0 ; time constant, in ps

Ref\_p = 1.0 ; reference pressure, in bar

Compressibility = 4.5e-5 ; isothermal compressibility of water, bar<sup>-1</sup>

Refcoord\_scaling = com

### Periodic boundary conditions

Pbc = xyz ; 3-D PBC

**Dispersion correction** is not used for proteins with the C36 additive FF

DispCorr = no

### Velocity generation

gen\_vel = no ; velocity generation off after NVT

### Script S3 MD run :

title = OPLS Mpro NPT equilibration

### Run parameters

integrator = md ; leap-frog integrator

nsteps = 20000000 ; 2 \* 20000000 = 40000 ps (40 ns)

Dt = 0.002 ; 2 fs

### Output control

nstxout = 0 ; suppress bulky .trr file by specifying

nstvout = 0 ; 0 for output frequency of nstxout,

nstfout = 0 ; nstvout, and nstfout

nstenergy = 5000 ; save energies every 10.0 ps

nstlog = 5000 ; update log file every 10.0 ps

nstxout-compressed = 5000 ; save compressed coordinates every 10.0 ps

compressed-x-grps = System ; save the whole system

## **Bond parameters**

Continuation = yes ; Restarting after NPT  
Constraint\_algorithm = lincs ; holonomic constraints  
Constraints = h-bonds ; bonds involving H are constrained  
Lincs\_iter = 1 ; accuracy of LINCS  
Lincs\_order = 4 ; also related to accuracy

## **Neighbor searching**

Cutoff-scheme = Verlet ; Buffered neighbor searching  
Ns\_type = grid ; search neighboring grid cells  
Nstlist = 10 ; 20 fs, largely irrelevant with Verlet scheme  
Rcoulomb = 1.0 ; short-range electrostatic cutoff (in nm)  
Rvdw = 1.0 ; short-range van der Waals cutoff (in nm)

## **Electrostatics**

Coulombtype = PME ; Particle Mesh Ewald for long-range electrostatics  
Pme\_order = 4 ; cubic interpolation  
Fourierspacing = 0.16 ; grid spacing for FFT

## **Temperature coupling is on**

Tcoupl = V-rescale ; modified Berendsen thermostat  
Tc-grps = Protein Non-Protein ; two coupling groups - more accurate  
Tau\_t = 0.1 0.1 ; time constant, in ps  
Ref\_t = 300 300 ; reference temperature, one for each group, in K

## **Pressure coupling is on**

Pcoupl = Parrinello-Rahman ; Pressure coupling on in NPT  
Pcoupltype = isotropic ; uniform scaling of box vectors  
Tau\_p = 2.0 ; time constant, in ps  
Ref\_p = 1.0 ; reference pressure, in bar  
Compressibility = 4.5e-5 ; isothermal compressibility of water, bar<sup>-1</sup>

## **Periodic boundary conditions Pbc**

= xyz ; 3-D PBC

## **Dispersion correction**

DispCorr = EnerPres ; account for cut-off vdW scheme

## **Velocity generation**

Gen\_vel = no ; Velocity generation is off

## **Script 4 Interaction energy run**

Title = Mpro-ligand complex MD simulation

## **Run parameters**

Integrator = md ; leap-frog integrator

Nsteps = 5000000 ; 2 \* 5000000 = 10000 ps (10 ns)

Dt = 0.002 ; 2 fs

## **Output control**

Nstenergy = 5000 ; save energies every 10.0 ps Nstlog

= 5000 ; update log file every 10.0 ps

Nstxout-compressed= 5000 ; save coordinates every 10.0 ps

Energygrps = Protein lig1

## **Bond parameters**

Continuation = yes ; continuing from NPT

Constraint\_algorithm = lincs ; holonomic constraints

Constraints = h-bonds ; bonds to H are constrained

Lincs\_iter = 1 ; accuracy of LINCS

Lincs\_order = 4 ; also related to accuracy

## **Neighbor searching and vdW**

Cutoff-scheme = Verlet

Ns\_type = grid ; search neighboring grid cells

Nstlist = 20 ; largely irrelevant with Verlet

Rlist = 1.2



Vdwttype = cutoff  
Vdw-modifier = force-switch  
Rvdw-switch = 1.0  
Rvdw = 1.2 ; short-range van der Waals cutoff (in nm)

### **Electrostatics**

Coulombtype = PME ; Particle Mesh Ewald for long-range electrostatics  
Rcoulomb = 1.2  
Pme\_order = 4 ; cubic interpolation  
Fourierspacing = 0.16 ; grid spacing for FFT

### **Temperature coupling**

Tcoupl = V-rescale ; modified Berendsen thermostat  
Tc-grps = Protein\_lig1 Water\_and\_ions ; two coupling groups - more accurate  
Tau\_t = 0.1 0.1 ; time constant, in ps  
Ref\_t = 300 300 ; reference temperature, one for each group, in K

### **Pressure coupling**

Pcoupl = Parrinello-Rahman ; pressure coupling is on for NPT  
Pcoupltype = isotropic ; uniform scaling of box vectors  
Tau\_p = 2.0 ; time constant, in ps  
Ref\_p = 1.0 ; reference pressure, in bar  
Compressibility = 4.5e-5 ; isothermal compressibility of water, bar<sup>-1</sup>

### **Periodic boundary conditions**

Pbc = xyz ; 3-D PBC

### **Dispersion correction is not used for proteins with the C36 additive FF**

DispCorr = no

### **Velocity generation**

Gen\_vel = no ; continuing from NPT equilibration

## Reference

1. Qureshi, A.; Kaur, G.; Kumar, M. AVCpred: an integrated web server for prediction and design of antiviral compounds. *Chem Biol Drug Des* **2017**, *89*, 74-83, doi:10.1111/cbdd.12834.
